# Supplementary material for: Unravelling redox processes of Li7MnN4 upon electrochemical Li extraction–insertion using operando XAS
Source: Royal Society of Chemistry journal article supplement (doi:10.1039/c7cp05207c), 2017-01-01

# Unravelling redox processes of $\text{Li}_7\text{MnN}_4$ upon electrochemical Li extraction-insertion using *operando* XAS

D. Muller-Bouvet <sup>a</sup>, N. Emery <sup>\*,a</sup>, N. Tassali <sup>a</sup>, E. Panabière <sup>a</sup>, S. Bach <sup>a,b</sup>, O. Crosnier <sup>c,d</sup>, T. Brousse <sup>c,d</sup>, C. Cénac-Morthe <sup>e</sup>, A. Michalowicz <sup>\*,f</sup>, J.P. Pereira-Ramos <sup>a</sup>

<sup>a</sup>. Institut de Chimie et des Matériaux Paris Est, GESMAT, UMR CNRS UPEC 7182, 2 rue Henri Dunant, 94320 Thiais France. E-mail : emery@icmpe.cnrs.fr

<sup>b</sup>. Université d'Evry Val d'Essonne, Bd F. Mitterrand, Département Chimie, 91025 Evry Cedex, France.

<sup>c</sup>. IMN, UMR6502 La Chantrerie, rue Christian Pauc, 44306 Nantes, France

<sup>d</sup>. RS2E, FR3459 CNRS, France.

<sup>e</sup>. CNES, 118 avenue Edouard Belin, 31401 Toulouse Cedex 9, France.

<sup>f</sup>. Institut de Chimie et des Matériaux Paris Est, UMR CNRS UPEC 7182, 2 rue Henri Dunant, 94320 Thiais France. E-mail : michalow@wanadoo.fr

## ESI 1

Electrochemical curve of the full oxidation/reduction cycle studied here

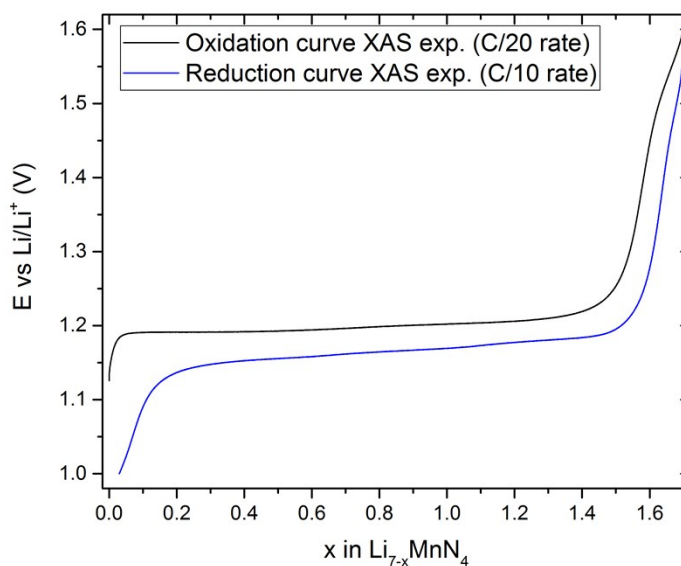

## ESI 2

Constraints and initial guess introduced in the MCR-ALS model:

i) Concentration constraints

- non-negativity: the concentration profile cannot be negative
- closure: the total concentration of manganese is kept to 100%
- known-concentrations : environment 3 is absent at the beginning of the reaction, and environment 1 at the end.

ii) Spectra initial guess: the three "pure" environments (Env1, Env2 and Env3) are calculated from the following initial assumption:

- We know the nature of the initial material: Env1=Li<sub>7</sub>MnN<sub>4</sub>
- We assume that the maximum concentration of the intermediate specie corresponds to x=0.9 *i.e.* Env2=Li<sub>6.1</sub>MnN<sub>4</sub>
- At the end of the oxidation, the average manganese oxidation state should be Mn<sup>6.7+</sup>. We assume that it is the result of a 30% Mn<sup>6+</sup> + 70% Mn<sup>7+</sup> mixture. Therefore, the initial guess for the third environment is Env3=(Li<sub>5.3</sub>MnN<sub>4</sub>-0.3 Li<sub>6.1</sub>MnN<sub>4</sub>)/0.7.

During the MCR-ALS iterations the three environments are allowed to vary under the concentration and normalization constraints

### ESI 3

Selected recomposition of various spectra using pure environment spectra Env.1, Env. 2 and Env. 3 determined from the MCR-ALS procedure.

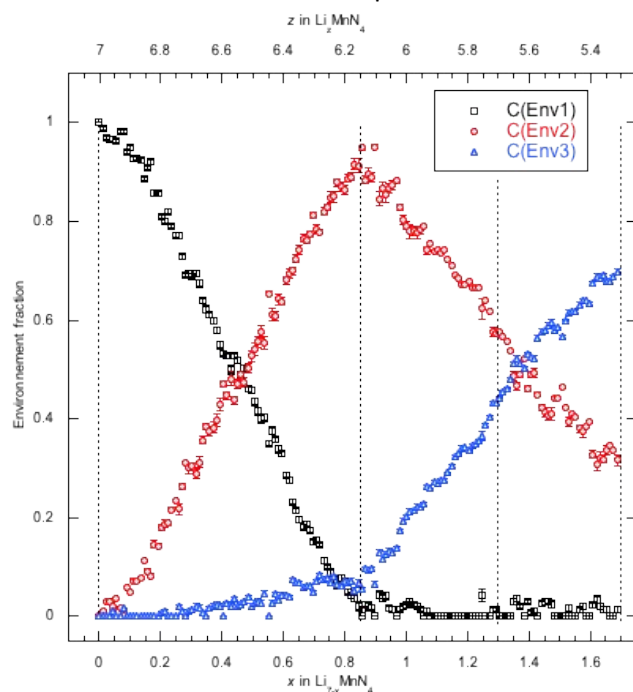

| x in Li <sub>7-x</sub> MnN <sub>4</sub> | C(Env1) % | C(Env2) % | C(Env3) % |
|-----------------------------------------|-----------|-----------|-----------|
| 0                                       | 100       | 0         | 0         |
| 0.85                                    | 0         | 95        | 5         |
| 1.3                                     | 1         | 57        | 43        |
| 1.7                                     | 0         | 31        | 69        |

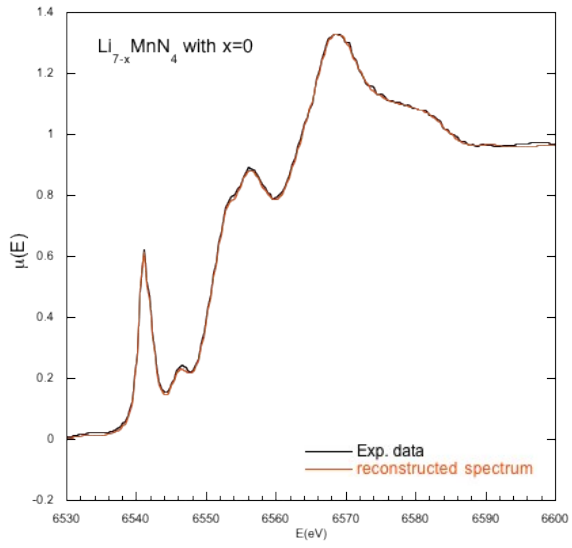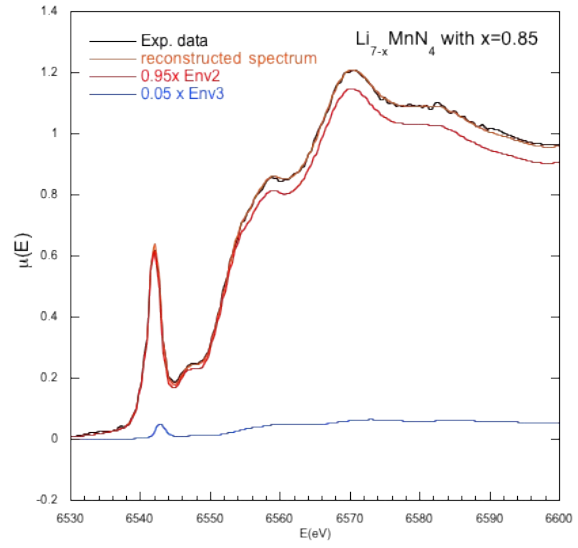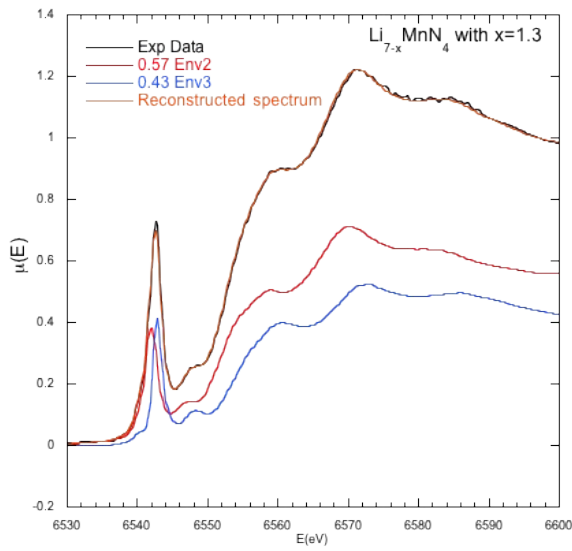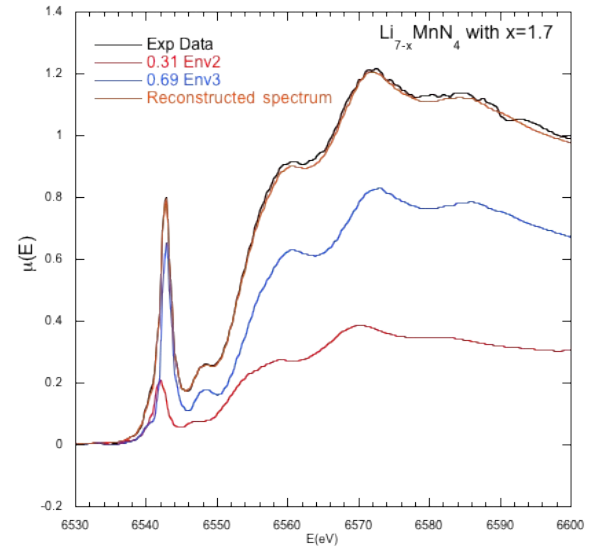

Supplement: c7cp05207c1.pdf [file c7cp05207c1.pdf]
